# Supplementary figures and images for: Development of a country-wide seismic site-response zonation map for the Netherlands
Source: Copernicus journal article supplement (doi:10.5194/nhess-2021-252), 2021-08-26

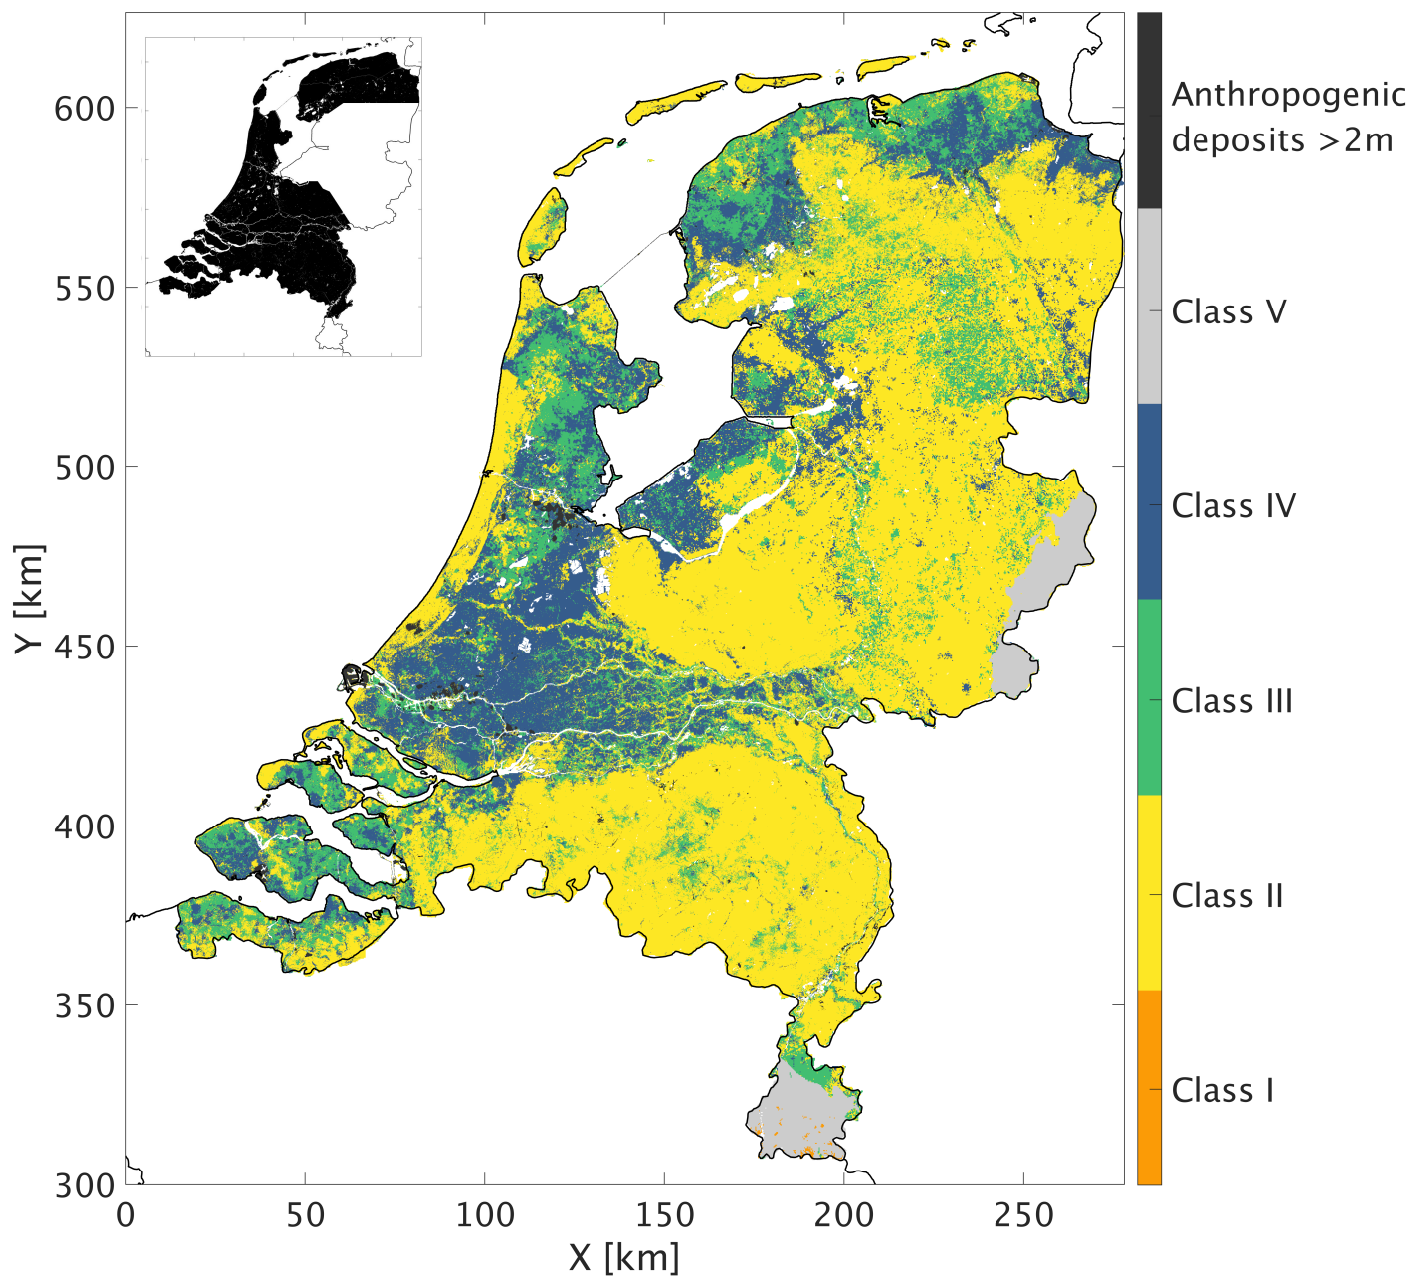

Supplement: Supplementary file 1 [file nhess-2021-252-supplement.zip]
